# Supplementary figures and images for: Disturbed function of TBL1X has a differential effect on T3-regulated gene expression in two human liver cell models
Source: PubMed Central journal article supplement — Eur Thyroid J. 2024 Oct 14;13(5):e240162. doi: 10.1530/ETJ-24-0162 (PMC11558919; doi:10.1530/etj-24-0162), 2024-10-14

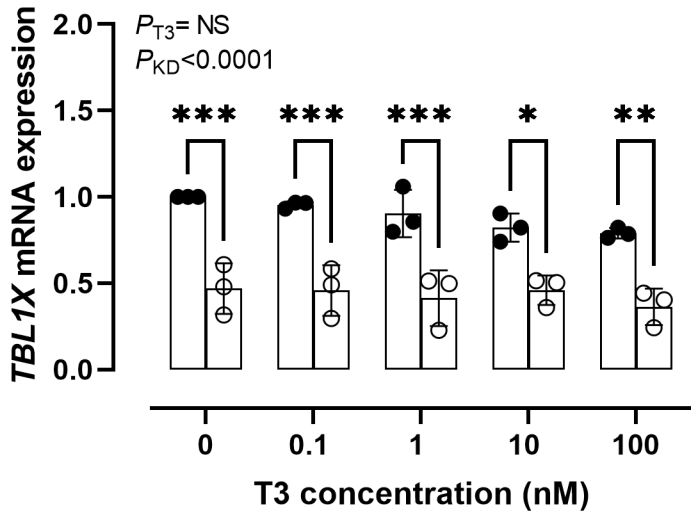

- NC
- *TBL1X1* KD

Supplement: supplementary_figure_1.pdf [file supplementary_figure_1.pdf]

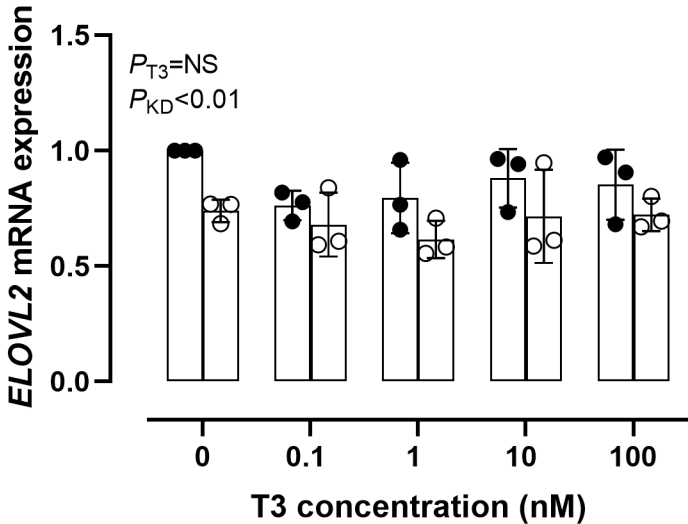

Supplement: supplementary_figure_2.pdf [file supplementary_figure_2.pdf]

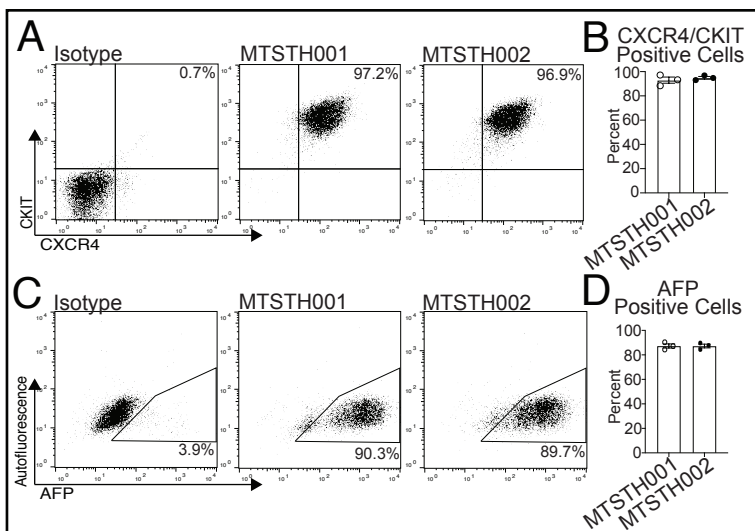

Supplement: supplementary_figure_3.pdf [file supplementary_figure_3.pdf]

## *HNF4*

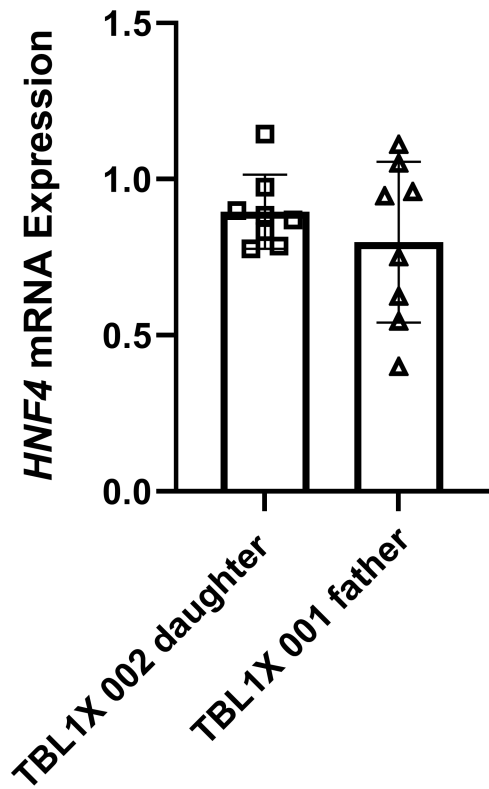

## *AFP*

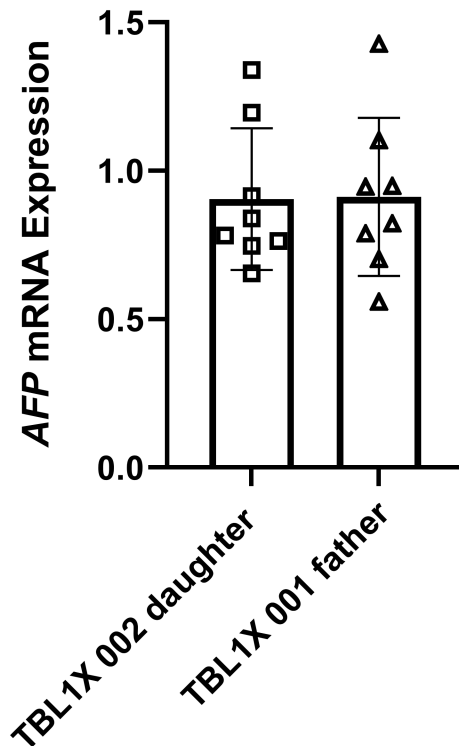

Supplement: supplementary_figure_4.pdf [file supplementary_figure_4.pdf]
